# Supplementary material for: A substrate-enhanced MoS2 photodetector through a dual-photogating effect
Source: Royal Society of Chemistry journal article supplement (doi:10.1039/c8mh01429a), 2019-01-01
Supplement: c8mh01429a1.pdf [file c8mh01429a1.pdf]

## Supporting Information

### Substrate-enhanced MoS<sub>2</sub> Photodetector through Dual-photogating Effect

*Ke Zhang, Mingzeng Peng, Aifang Yu, Youjun Fan, Junyi Zhai\* and Zhong Lin Wang\**

#### 1. PL and AFM characterizations of CVD-grown MoS<sub>2</sub>.

Its PL spectrum consists of two peaks at 670nm (1.85eV) and 620nm (2.00eV), corresponding to the A and B direct gap optical transition. The thickness measured by AFM is ~0.7 nm, which approaches to the theoretical thickness of monolayer MoS<sub>2</sub>.

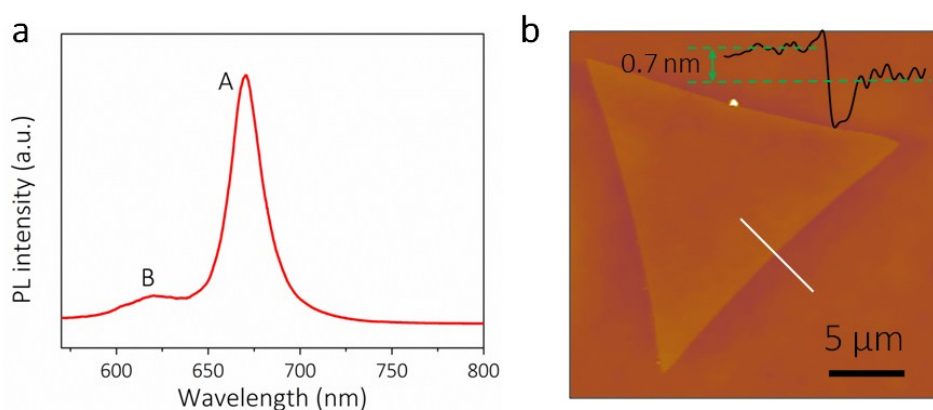

Figure S1. (a) Typical PL spectrum of monolayer MoS<sub>2</sub>. (b) AFM morphology measurement of triangle MoS<sub>2</sub> flake. The thickness is ~0.7 nm.

#### 2. Surface morphologies of four kinds of substrate and roughness measurements.

Rigid substrates, such as SiC and SiO<sub>2</sub>/Si, has more flat surface because of maturing growth and polishing techniques. In contrast, flexible polymer substrates, such as Kapton and PET, are relatively coarse. The surface roughness of SiO<sub>2</sub>/Si, SiC, Kapton and PET are 0.152 nm, 0.340 nm, 0.994 nm and 2.466 nm, respectively.

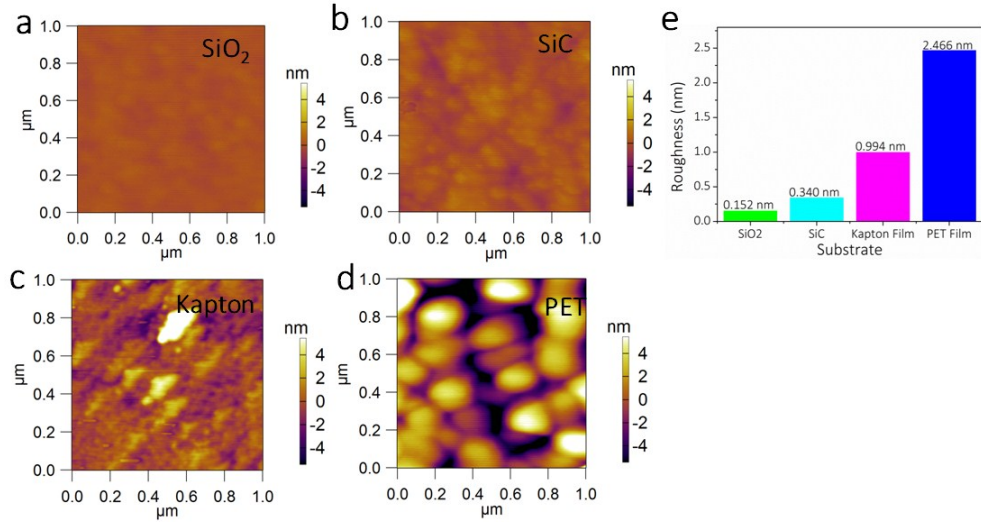

Figure S2. (a-d) Surface morphologies of SiO<sub>2</sub>/Si, SiC, Kapton and PET, respectively. (e) Surface roughness of four substrates.

### 3. In-plane conductivity of undoped-SiC substrate.

Undoped-SiC substrate has ultra-weak in-plane current (Cr/Au electrodes and  $L_{\text{channel}} = 5 \mu\text{m}$ ), even in illumination. Meanwhile, it presents asymmetric I-V curves both under UV and VIS illumination.

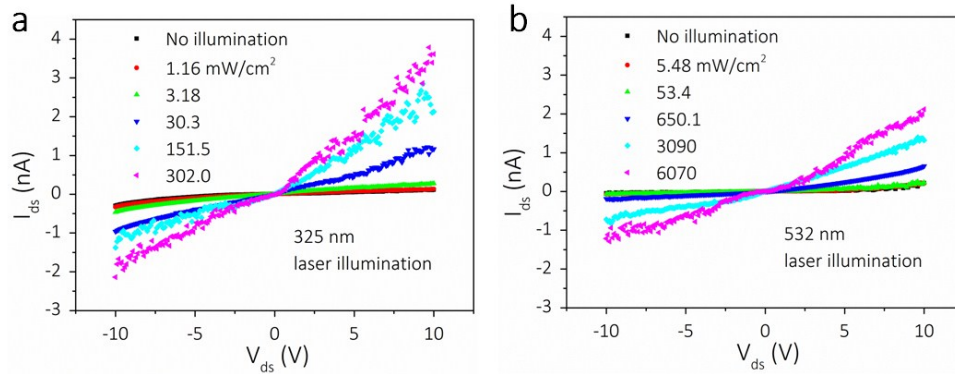

Figure S3. (a) In-plane current of undoped-SiC substrate under UV illumination. (b) In-plane current of undoped-SiC substrate under VIS illumination.

### 4. Photoresponse performances of MoS<sub>2</sub> PDs under referred substrate.

As reference, we also measured the photoresponse performance of MoS<sub>2</sub> PDs based on common SiO<sub>2</sub>/Si substrate and Kapton substrate in order to reveal the effect of substrate. By contrast, substrates with light absorption (SiC and Kapton) have significant assistance for photoresponse enhancement of MoS<sub>2</sub> PD.

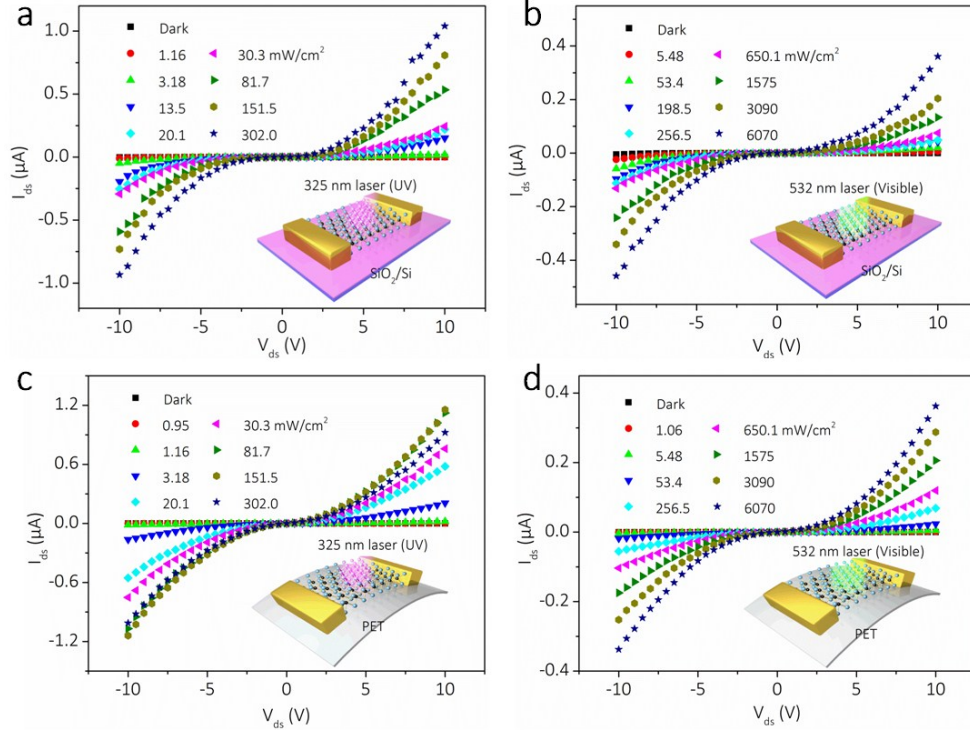

Figure S4. (a-b) I-V curves of MoS<sub>2</sub>/SiO<sub>2</sub>/Si PD under UV and VIS illumination, respectively. (c-d) I-V curves of MoS<sub>2</sub>/PET PD under UV and VIS illumination, respectively.

## 5. Photoresponse performance of MoS<sub>2</sub>/Kapton PD under VIS illuminations.

The photoresponse of MoS<sub>2</sub>/Kapton PD is not substantively enhanced under VIS illumination. The energy of VIS light is not enough to excite the photoelectret states and generate photoexcited carriers. Therefore, second photogating effect will be not happened at MoS<sub>2</sub>/Kapton interface and not improve the photocurrent.

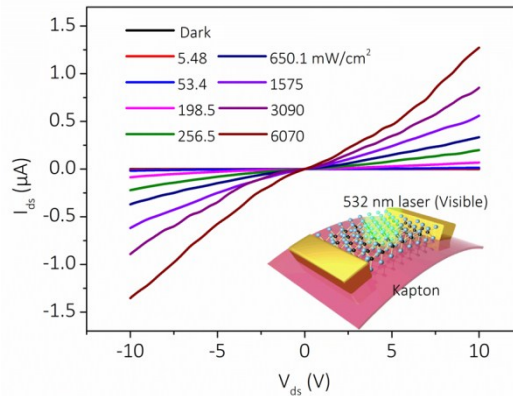

Figure S5. I-V curves of MoS<sub>2</sub>/Kapton PD under VIS (532 nm laser) illumination.

## 6. Fabrication of MoS<sub>2</sub>-FET with PI gate.

Monolayer MoS<sub>2</sub> FET firstly is constructed on SiO<sub>2</sub>/p+-Si substrate in same method with PDs. Secondly, a layer of PMMA is spun-coated in the device and baked at 150 °C for 3 mins. Thirdly, the area of MoS<sub>2</sub> is exposed by EBL. Fourthly, a layer of PI precursor (Poly (pyromellitic dianhydride-co-4,4'-oxydianiline), amic acid solution) is spun-coated and the whole device is baked at 180 °C for 4 hours in Ar atmosphere. Finally, PMMA layer is dissolved by

acetone solution. Figure S6b shows the optical image of the device. Monolayer MoS<sub>2</sub> is outlined by red dashed line (triangle). PI gate is outlined by green red dashed line (rectangle).

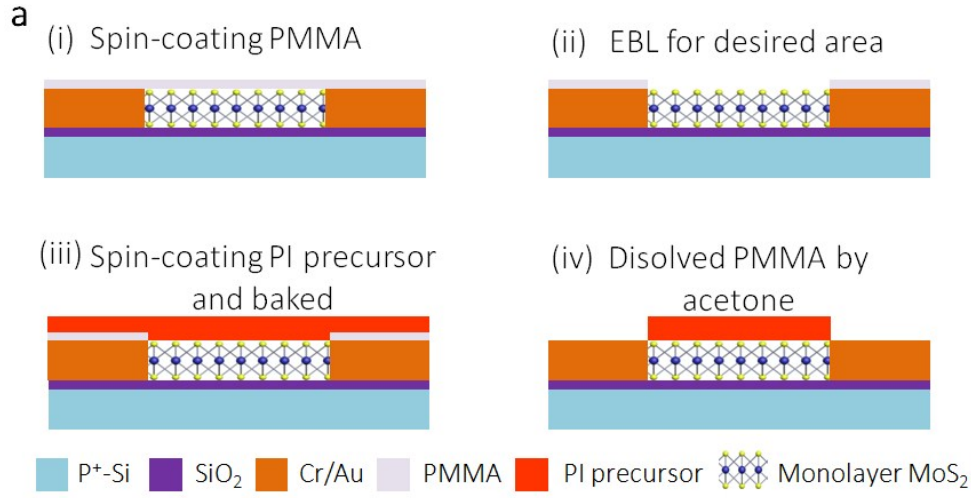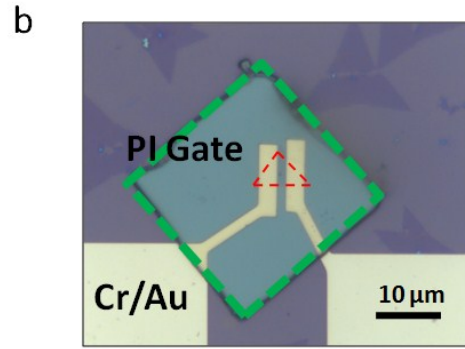

Figure S6. (a) The construction processes of MoS<sub>2</sub>-FET with a layer of PI coating. (b) Optical microscope image of MoS<sub>2</sub>-FET with PI gate.

## 7. Output curves measurement of MoS<sub>2</sub>-FET under UV illuminations.

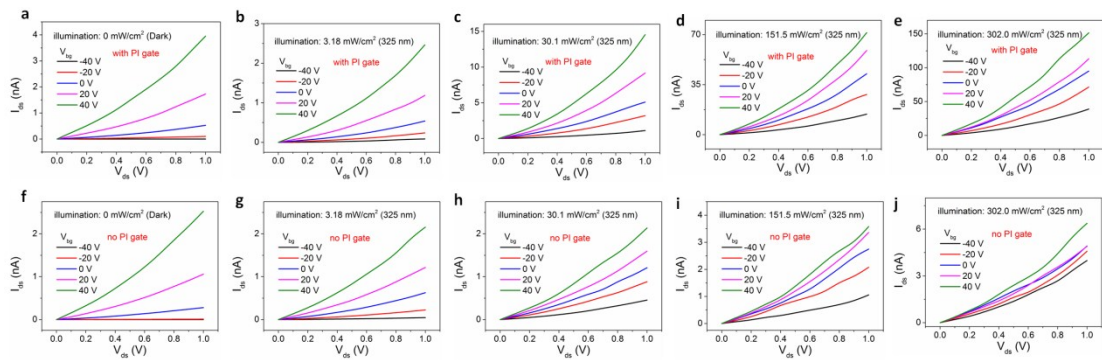

Figure S7.  $I_{ds}$ - $V_{ds}$  output characteristics of monolayer MoS<sub>2</sub> FET (a-e) with PI gate and (f-j) without PI gate in dark and different UV optical power intensity.

## 8. Transient performances of MoS<sub>2</sub>-based PDs.

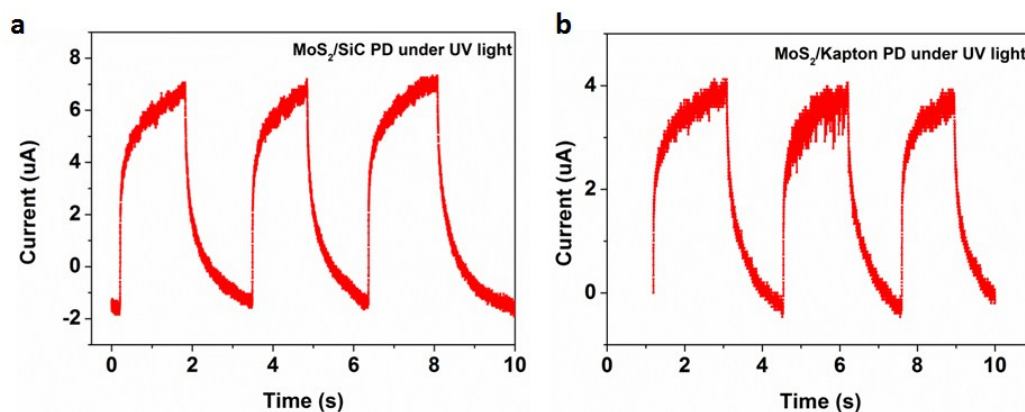

Figure S8. The transient response of (a) MoS<sub>2</sub>/SiC PD and (b) MoS<sub>2</sub>/Kapton PD.

### 9. Summary of photoresponse performances of MoS<sub>2</sub> PDs in this work.

Table S1. Summary and comparison in photoresponse performances of MoS<sub>2</sub> PDs under different substrates under UV and VIS illumination.

| 325 nm laser illumination              |                           |                                 |            |                      |       | 532 nm laser illumination |                                 |            |                      |      |
|----------------------------------------|---------------------------|---------------------------------|------------|----------------------|-------|---------------------------|---------------------------------|------------|----------------------|------|
| Parameters                             | $I_{\text{dark}}$<br>(nA) | $I_{\text{ph}}/I_{\text{dark}}$ | R<br>(A/W) | D (Jones)            | G     | $I_{\text{dark}}$<br>(nA) | $I_{\text{ph}}/I_{\text{dark}}$ | R<br>(A/W) | D (Jones)            | G    |
| Devices                                |                           |                                 |            |                      |       |                           |                                 |            |                      |      |
| MoS <sub>2</sub> /SiC                  | 83.6                      | 9813                            | 10231      | $6.4 \times 10^{11}$ | 39132 | 83.6                      | 1208                            | 1602       | $1.0 \times 10^{11}$ | 3749 |
| MoS <sub>2</sub> /SiO <sub>2</sub> /Si | 3.27                      | 284.5                           | 44         | $1.4 \times 10^{10}$ | 168   | 3.27                      | 139.3                           | 30         | $9.5 \times 10^9$    | 70   |
| MoS <sub>2</sub> /Kapton               | 0.17                      | 107879                          | 319        | $4.5 \times 10^{11}$ | 1222  | 0.17                      | 7692                            | 5          | $6.4 \times 10^9$    | 11   |
| MoS <sub>2</sub> /PET                  | 0.16                      | 7382                            | 136        | $2.0 \times 10^{11}$ | 518   | 0.16                      | 2316                            | 9          | $9.7 \times 10^9$    | 16   |

## 10. Summary of MoS<sub>2</sub> PDs in previous studies and this work.

We summarized the photoresponse performances of MoS<sub>2</sub> PDs in previous studies and this work. It is observed that MoS<sub>2</sub> PDs in this work can achieve high photoresponse behaviors without applying electric gate voltage or other assistant methods. The performance is enhanced through dual-photogating effect from MoS<sub>2</sub> and substrates.

Table S2. Summary and comparison of the photoresponse performances of MoS<sub>2</sub> PDs in previous studies and this work.

| Devices                           | Substrate                            | Regulation                  | Excitation laser (nm) | R (A/W)          | I <sub>ph</sub> /I <sub>dark</sub> | D (Jones)            | Ref.      |
|-----------------------------------|--------------------------------------|-----------------------------|-----------------------|------------------|------------------------------------|----------------------|-----------|
| MoS <sub>2</sub> /SiC             | undoped-SiC                          | dual-photogating effect     | 325                   | 10231            | ~10 <sup>4</sup>                   | 6.4x10 <sup>11</sup> | this work |
| MoS <sub>2</sub> /SiC             | undoped-SiC                          | dual-photogating effect     | 532                   | 1602             | ~10 <sup>3</sup>                   | 1.0x10 <sup>11</sup> | this work |
| MoS <sub>2</sub> /Kapton          | Kapton                               | dual-photogating effect     | 352                   | 319              | ~10 <sup>5</sup>                   | 4.5x10 <sup>11</sup> | this work |
| MoS <sub>2</sub> phototransistor  | p <sup>+</sup> -SiO <sub>2</sub> /Si | gate voltage (-70 V)        | 561                   | 880              | —                                  | —                    | [10]      |
| MoS <sub>2</sub> -P(VDF-TrFE)     | SiO <sub>2</sub> /Si                 | ferroelectrics              | 635                   | 2570             | ~10 <sup>3</sup>                   | 2.2x10 <sup>12</sup> | [13]      |
| MoS <sub>2</sub> -CuO             | PET                                  | strain                      | 532                   | 0.01             | ~10 <sup>3</sup>                   | 3.3x10 <sup>8</sup>  | [21]      |
| MoS <sub>2</sub> -GaN nanowires   | Kapton                               | strain & gate voltage (1V)  | 550                   | 734.5            | ~10 <sup>5</sup>                   | —                    | [22]      |
| MoS <sub>2</sub> -PbS QDs         | p <sup>+</sup> -SiO <sub>2</sub> /Si | QDs & gate voltage (-100 V) | 633                   | ~10 <sup>6</sup> | —                                  | 7x10 <sup>14</sup>   | [18]      |
| MoS <sub>2</sub> -Au structure    | quartz                               | plasmon induced             | 1070                  | 5.2              | —                                  | —                    | [20]      |
| MoS <sub>2</sub> -WS <sub>2</sub> | SiO <sub>2</sub> /Si                 | heterojunction              | 633                   | 1.42             | —                                  | —                    | [23]      |
| Multilayer MoS <sub>2</sub> PD    | glass                                | gate voltage (8 V)          | 532                   | 342.6            | ~10 <sup>2</sup>                   | —                    | [14]      |
